# Supplementary material for: Optimization of the zinc oxide electron transport layer in P3HT:PC61BM based organic solar cells by annealing and yttrium doping
Source: Royal Society of Chemistry journal article supplement (doi:10.1039/c5ra05258k), 2015-01-01
Supplement: c5ra05258k1.pdf [file c5ra05258k1.pdf]

### Supporting Information

#### Optimization of the zinc oxide electron transport layer in P3HT:PC61BM based organic solar cells by annealing and yttrium doping

Sayantana Das and T. L. Alford\*

*Department of Chemistry and Biochemistry and School for Engineering of Matter, Transport and Energy Arizona State University, Tempe, Arizona 85287, USA*

**TABLE 1** Device parameters of ZnO based inverted organic solar cells under illumination

| ZnO anneal Temperature (°C) | $V_{oc}$ (V) | $J_{sc}$ (mA/cm <sup>2</sup> ) | FF(%)       |
|-----------------------------|--------------|--------------------------------|-------------|
| 50                          | 0.59 ± 0.02  | 7.78 ± 0.13                    | 27.8 ± 0.31 |
| 150                         | 0.60 ± 0.01  | 8.72 ± 0.17                    | 41.7 ± 0.24 |
| 300                         | 0.60 ± 0.01  | 8.76 ± 0.09                    | 32.9 ± 0.11 |
| 450                         | 0.48 ± 0.03  | 6.64 ± 0.12                    | 31.4 ± 0.27 |

**TABLE 2** Device parameters of Y doped ZnO based inverted organic solar cells under illumination

| ETL     | $V_{oc}$ (V) | $J_{sc}$ (mA/cm <sup>2</sup> ) | FF(%)       |
|---------|--------------|--------------------------------|-------------|
| ZnO     | 0.60 ± 0.01  | 8.72 ± 0.17                    | 41.7 ± 0.24 |
| 0.5%YZO | 0.59 ± 0.01  | 9.19 ± 0.09                    | 49.2 ± 0.17 |
| 1.0%YZO | 0.59 ± 0.01  | 9.81 ± 0.12                    | 49.3 ± 0.21 |
| 1.5%YZO | 0.60 ± 0.01  | 8.98 ± 0.18                    | 51.5 ± 0.26 |
| 2.0%YZO | 0.60 ± 0.01  | 8.99 ± 0.21                    | 50.3 ± 0.34 |

**Series Resistance ( $R_s$ ) and shunt resistance ( $R_{sh}$ ) are evaluated from the following equations:**

$$R_s = \left( \frac{dV}{dJ} \right)_{V=V_{oc}}$$

$$R_{sh} = \left( \frac{dV}{dJ} \right)_{J=J_{SC}}$$
